# Supplementary material for: Trajectories of health-related quality of life among people with a physical disability and/or chronic disease during and after rehabilitation: a longitudinal cohort study
Source: Qual Life Res. 2020 Sep 28;30(1):67–80. doi: 10.1007/s11136-020-02647-7 (PMC7847859; doi:10.1007/s11136-020-02647-7)
Supplement: Supplementary file 1 — Supplementary file1 (CSV 36 kb) [file 11136_2020_2647_MOESM1_ESM.csv]

ID	GHC_T0	GHC_T1	GHC_T2	GHC_T3
1	9999	25,6039	20,3743	9999
2	9999	30,9572	9999	24,6223
3	9999	49,5812	55,5061	9999
4	9999	29,3809	23,4717	25,3587
5	9999	26,5209	31,9138	25,8122
6	9999	9999	18,3863	14,6215
7	9999	34,9157	30,1491	9999
8	9999	43,1642	34,1016	39,1097
9	9999	25,7686	27,0674	23,2612
10	9999	43,43	9999	52,5565
11	27,3175	30,672	33,4535	31,5105
12	9999	36,8835	35,3795	29,1682
13	9999	42,3218	51,5288	9999
14	37,258	43,8862	36,6061	39,3736
15	31,5581	32,3503	31,2165	36,4085
16	46,5119	44,9809	56,905	55,1977
17	30,953	36,5735	9999	50,4834
18	26,1103	35,4789	51,5989	9999
19	33,3771	29,3809	9999	9999
20	35,0347	49,7453	43,1878	48,6447
21	20,4193	18,8901	19,9536	16,1579
22	30,2506	19,5312	24,0656	31,4296
23	37,2177	45,5791	42,8604	51,333
24	31,5513	33,7024	9999	9999
25	40,0949	41,6274	9999	9999
26	40,2804	43,241	9999	9999
27	41,0904	34,5374	29,9392	9999
28	32,9259	9999	32,6719	9999
29	40,5754	41,2364	45,8788	51,547
30	9999	28,2848	26,8583	28,7034
31	50,5571	46,8244	9999	47,4919
32	9999	9999	46,8802	40,5207
33	29,9891	9999	9999	48,3381
34	9999	37,2498	9999	42,0942
35	40,7112	48,7818	9999	9999
36	28,0685	9999	25,2263	25,7759
37	9999	35,2183	36,4785	37,9973
38	22,9793	33,8147	9999	41,0029
39	50,8613	57,3031	58,7962	59,3542
40	40,2558	46,9392	49,7271	9999
41	9999	42,33	35,8983	9999
42	31,6732	33,7553	42,7662	44,9908
43	39,9943	9999	9999	43,7543
44	38,8356	43,9944	9999	9999
45	33,4957	32,185	33,2355	31,4155
46	35,5818	9999	45,3452	45,1666
47	32,763	29,6491	9999	36,8257
48	25,5354	9999	31,7609	28,087
49	41,8617	37,2586	45,0896	35,877
50	53,0844	9999	9999	38,3323
51	31,986	34,1016	33,0892	31,4806
52	34,1963	28,2784	28,921	30,8383
53	33,0717	9999	34,3705	45,8265
54	48,8065	57,5664	43,949	37,6362
55	29,4562	30,3865	34,862	40,5153
56	9999	49,9404	56,6408	9999
57	34,5186	43,5561	9999	46,5949
58	33,0495	42,8457	9999	9999
59	29,4279	26,6411	22,6634	9999
60	32,1691	9999	9999	40,2931
61	9999	25,3566	32,5248	32,9551
62	41,6899	39,9976	44,6023	39,4541
63	29,0127	33,3464	41,7303	32,4541
64	19,1402	32,059	28,3553	33,8698
65	36,8777	25,4689	32,8333	9999
66	31,5043	9999	33,3138	9999
67	52,357	48,1539	51,4953	46,1269
68	43,3668	34,0531	37,9475	32,55
69	26,6142	33,2446	24,7923	32,7231
70	32,5789	36,0885	40,627	40,32
71	22,5047	48,8964	52,9904	9999
72	33,1758	38,6586	9999	28,1223
73	9999	27,4434	29,9451	29,4016
74	28,7554	40,7633	9999	9999
75	38,5768	36,0299	45,1056	37,45
76	40,5245	17,3674	35,495	32,0432
77	26,027	29,1311	31,5233	29,0784
78	46,1168	9999	48,1996	48,8255
79	33,5839	30,1149	9999	9999
80	26,7383	9999	46,4712	9999
81	39,0152	41,3895	41,5166	44,8936
82	27,7244	29,84	28,4574	27,6539
83	25,6785	32,2889	35,341	25,9805
84	31,9603	14,6643	34,5291	37,6244
85	53,1117	49,3517	55,2535	53,1693
86	22,0899	35,315	9999	45,6334
87	30,202	35,0932	34,9643	42,8151
88	43,2314	34,2078	34,2605	37,6094
89	32,198	32,9754	35,5782	29,6136
90	32,3825	29,4519	17,6745	15,58
91	48,8501	55,4045	52,7744	55,5977
92	41,502	43,5466	32,4561	43,2383
93	30,5443	9999	34,9614	32,1432
94	32,2819	43,8117	41,7466	45,6342
95	50,2415	50,2415	53,3058	46,9525
96	23,5883	32,4764	35,4321	31,1656
97	46,9585	9999	46,1181	9999
98	56,5579	57,8248	63,6696	61,8645
99	40,314	42,4717	45,6431	41,8369
100	41,0013	34,8692	39,6467	42,7233
101	51,9103	53,5481	9999	9999
102	38,4955	44,2039	9999	9999
103	48,7369	46,405	47,1728	50,6897
104	32,9624	34,8687	34,2882	32,2112
105	36,5204	35,099	40,9152	36,816
106	28,2365	19,1978	21,1477	33,124
107	44,8443	46,459	48,2641	52,4802
108	58,7077	57,3427	57,3427	60,2442
109	32,4819	25,8268	22,5365	27,1518
110	46,6705	52,2577	56,5956	59,6756
111	30,1511	34,0139	34,8461	31,2598
112	61,2219	57,6662	54,4649	63,6696
113	44,3828	41,3716	48,3974	42,7555
114	9999	40,4763	47,7367	37,7125
115	28,6114	47,4721	33,6848	9999
116	28,7147	34,2411	28,5971	37,8574
117	24,8043	30,816	29,452	9999
118	50,639	53,781	9999	9999
119	44,3003	47,372	46,058	41,9994
120	34,2111	33,8256	33,2806	41,8589
121	38,872	40,3678	36,8605	43,2262
122	40,0647	41,3902	46,1264	9999
123	31,9259	40,1634	36,9199	34,264
124	31,0566	44,1621	41,9458	9999
125	42,09	44,9473	44,0361	9999
126	31,699	31,986	31,986	9999
127	33,0233	42,1274	9999	37,9153
128	37,9219	38,2672	42,2317	36,5455
129	15,0713	20,8126	18,9428	24,2578
130	34,2392	9999	33,9526	9999
131	34,5365	30,9736	38,0337	9999
132	30,9066	24,8084	9999	9999
133	54,5028	54,3781	9999	57,4581
134	27,4268	27,9914	23,8197	27,5221
135	25,873	24,6644	23,5239	26,4788
136	9999	9999	52,3868	39,2539
137	33,0972	38,1817	39,564	34,7881
138	29,4473	35,4916	40,0525	9999
139	32,0585	9999	9999	33,8927
140	21,5322	21,5322	19,308	25,4689
141	46,2171	53,4527	55,5977	54,1571
142	17,1535	9999	13,2149	11,7662
143	38,2617	42,837	9999	9999
144	9999	31,6025	9999	29,5763
145	49,707	58,3761	46,0989	56,707
146	9999	48,5142	50,4905	9999
147	9999	35,7954	45,9534	52,5078
148	9999	9999	44,3231	49,3092
149	9999	45,4986	44,9337	47,1565
150	9999	44,0887	41,116	44,0298
151	9999	50,3366	47,0158	50,0287
152	9999	27,8419	32,5981	35,6667
153	27,8479	30,9681	29,6318	30,3553
154	31,5988	38,7126	9999	26,0884
155	34,7745	53,4204	55,1977	51,1047
156	35,8764	9999	9999	33,7564
157	30,5958	30,9923	29,2523	29,9092
158	47,4919	40,4892	50,0445	27,6437
159	40,9759	43,2167	42,9446	45,0044
160	51,4266	53,3323	51,1154	52,3353
161	35,7343	33,3517	34,6492	33,9448
162	9999	37,9609	53,9663	9999
163	26,5932	9999	21,8605	35,9184
164	33,8374	46,3842	38,184	40,8763
165	39,2856	38,8832	50,4834	40,071
166	27,8515	25,7143	19,7262	19,4975
167	43,2912	42,9795	35,9383	35,3485
168	34,4871	26,0166	34,4871	31,9988
169	41,6516	40,1968	37,2742	9999
170	46,2748	48,5142	45,0477	42,4473
171	25,9033	30,934	9999	9999
172	9999	43,9609	52,2076	52,8528
173	9999	55,7079	56,7308	56,2245
174	25,9441	49,7403	55,2097	9999
175	28,1816	38,9284	32,9754	33,0581
176	26,7975	30,9822	24,3368	20,478
177	38,0685	31,2039	41,8804	43,2169
178	50,6597	60,2442	60,2412	54,6156
179	34,345	43,2558	9999	37,8773
180	46,1492	44,7173	42,502	44,6646
181	41,2194	46,3241	45,3451	9999
182	9999	9999	21,1702	26,0989
183	40,3431	54,3339	9999	62,1416
184	25,5446	25,2221	29,2943	9999
185	41,2371	40,737	9999	9999
186	28,5313	38,4581	9999	9999
187	34,8034	9999	28,4459	9999
188	9999	51,009	51,009	52,385
189	35,0997	16,3691	27,2125	22,3419
190	36,8255	33,7116	35,4575	30,2821
191	57,6309	57,5004	57,0534	60,2552
192	36,4726	37,6474	33,9735	42,296
193	55,4746	53,7169	55,4188	56,6512
194	51,0081	50,5144	50,8114	49,5433
195	43,6551	9999	9999	44,0361
196	41,366	9999	39,5604	25,8607
197	41,5024	36,7006	53,8855	49,7893
198	44,8797	46,4977	34,2128	35,197
199	29,4336	30,1901	30,1901	9999
200	38,6149	9999	54,1257	43,7903
201	35,2834	37,4212	9999	9999
202	43,3503	36,384	32,9754	38,184
203	33,8881	38,8798	44,0359	36,837
204	46,8895	52,8617	53,7779	50,1545
205	48,0412	42,166	46,1397	42,6978
206	30,9092	33,139	39,7678	28,2884
207	24,1718	26,3695	19,308	9999
208	29,5429	37,3925	51,301	9999
209	36,0262	40,2142	36,1201	9999
210	38,5241	47,4278	42,9522	9999
211	55,0679	35,2013	55,333	61,3675
212	28,5892	27,1569	33,4258	34,9083
213	38,6893	38,6149	37,3213	40,9166
214	9999	23,5162	34,0254	33,743
215	9999	37,7313	9999	36,839
216	27,4086	24,6146	9999	9999
217	22,2107	22,7472	31,2811	9999
218	47,9603	54,5072	57,4581	53,847
219	28,1651	29,7948	9999	27,4086
220	42,2767	9999	9999	46,4872
221	33,6157	45,2334	34,6093	9999
222	29,6697	25,7376	29,1622	35,0608
223	30,0656	26,4335	27,6781	9999
224	28,0343	26,4102	28,526	9999
225	45,956	47,1326	36,8319	9999
226	25,9279	10,8818	9999	9999
227	35,743	39,314	35,0081	28,0802
228	26,0994	41,9064	25,3439	37,1272
229	54,8935	57,4303	54,3063	56,6512
230	15,0885	9999	19,1978	29,9482
231	42,4941	43,8032	9999	9999
232	9999	25,5738	28,052	23,0712
233	16,864	32,9925	18,3652	9999
234	16,0193	21,8693	17,9695	17,9456
235	41,1154	39,3767	9999	9999
236	39,5192	39,9574	36,3193	40,753
237	36,8777	9999	30,6461	9999
238	23,3646	29,6085	9999	9999
239	52,9775	52,7391	48,3567	9999
240	9999	57,5502	55,1678	53,9327
241	37,077	38,4955	31,6308	37,8636
242	38,609	41,153	56,6102	9999
243	9999	55,0536	48,8094	9999
244	31,5808	32,1287	33,1764	40,4956
245	45,1111	55,2811	9999	9999
246	24,8706	26,001	31,8849	31,0117
247	29,9031	26,3272	43,5523	42,2368
248	45,5855	35,6132	46,9736	9999
249	35,4789	38,5413	38,3737	32,7466
250	24,4129	28,4862	21,7594	9999
251	30,3351	32,6891	36,2578	32,4881
252	36,5749	36,0421	36,8202	37,4502
253	31,5216	30,921	9999	28,7174
254	34,3491	29,4278	34,8378	36,2721
255	24,3002	26,2179	27,4248	18,8487
256	32,2612	23,2747	9999	9999
257	58,8873	58,7714	58,4153	56,8364
258	34,395	30,9624	23,4874	9999
259	31,7725	40,0802	50,8818	46,9438
260	42,0815	56,4542	50,4779	53,2596
261	38,8055	36,7282	43,4357	38,3172
262	46,3872	58,3088	52,067	52,5974
263	20,4676	18,4297	28,5834	40,5203
264	29,7167	29,7338	29,0049	9999
265	41,7929	33,8806	37,0635	41,6509
266	44,2056	50,6681	9999	9999
267	45,515	48,0695	49,2574	44,4452
268	9999	34,6116	38,1931	9999
269	44,3365	57,5819	58,2245	63,1197
270	46,9424	9999	46,2212	46,9933
271	9999	31,2295	22,734	24,461
272	29,6985	32,9754	37,5742	9999
273	51,6716	52,0097	57,1048	55,6705
274	38,5768	36,5648	38,5768	40,9375
275	24,5391	22,5422	20,8533	23,9394
276	26,314	9999	25,1287	19,17
277	33,3733	9999	9999	39,2298
278	60,5718	47,5156	57,891	63,027
279	9999	59,564	40,7209	9999
280	32,964	32,6669	9999	9999
281	46,12	44,3606	52,0408	36,6552
282	9999	56,7102	60,1612	56,2302
283	57,2805	56,6642	60,7442	63,3518
284	40,3041	40,9341	38,8492	33,3482
285	47,7065	51,6716	9999	50,3276
286	32,267	35,3157	36,9292	38,2285
287	42,6512	47,0294	9999	9999
288	48,3254	44,516	45,6861	9999
289	44,2587	48,5387	51,4089	53,9653
290	44,9175	37,5025	9999	9999
291	34,4664	24,6909	24,2281	9999
292	38,0305	38,7159	46,6253	9999
293	48,0181	54,0852	52,4199	56,9878
294	31,6491	9999	38,9286	9999
295	52,9597	48,3233	48,6757	51,8625
296	45,5967	31,0935	39,3568	38,0215
297	22,0493	24,8186	19,842	21,2798
298	30,245	9999	9999	30,1341
299	42,3018	49,7829	41,3939	54,4388
300	31,4784	41,0269	9999	9999
301	40,0567	44,8508	32,2586	46,2188
302	45,2296	44,1444	33,7088	41,159
303	25,0237	9999	31,7362	9999
304	34,3505	34,5126	32,0271	43,8532
305	53,6816	55,1831	9999	9999
306	43,6593	9999	50,9453	9999
307	38,4763	9999	33,766	42,0769
308	33,5372	34,2922	33,0899	37,5973
309	48,5387	42,37	54,5511	54,3063
310	30,4521	9999	24,2459	18,414
311	32,1427	33,2788	45,2938	49,2631
312	21,5322	26,5173	23,7927	24,2243
313	42,859	40,703	48,8878	49,1569
314	40,0079	37,3677	9999	9999
315	32,1901	41,389	39,5246	40,8423
316	40,509	42,9816	46,0855	41,1666
317	30,9509	33,5823	26,1573	28,4355
318	21,503	20,8709	31,9898	33,3658
319	22,3181	22,97	9999	9999
320	24,9095	21,5322	31,6348	30,2801
321	42,2927	41,4215	36,7495	45,0602
322	45,9349	41,3145	33,5863	34,2289
323	9999	47,6922	49,2247	39,6801
324	59,0856	53,3114	58,569	59,0856
325	28,959	39,075	20,1766	42,8128
326	45,8241	9999	47,8382	54,1917
327	37,8657	49,3225	9999	38,2344
328	27,0301	29,5506	27,148	9999
329	38,4844	53,1165	46,2302	9999
330	32,8991	9999	9999	30,1489
331	49,3793	51,6199	45,6402	9999
332	30,3494	36,3277	36,2247	31,699
333	44,4562	9999	39,8684	46,1661
334	28,052	46,027	36,9157	39,7433
335	30,5196	41,3392	44,3003	41,5028
336	21,525	28,6713	36,7292	22,0737
337	53,4177	44,3564	48,5617	50,4211
338	44,2176	48,9706	52,2281	42,7017
339	9999	9999	44,2278	29,234
340	26,9032	33,6447	32,6136	26,5495
341	43,9185	46,0298	44,1391	40,7946
342	16,9572	17,9842	29,4612	9999
343	44,5039	40,3723	39,7506	37,9986
344	27,025	32,3512	21,9168	34,7063
345	37,1561	44,0529	46,439	40,9206
346	30,8503	24,1481	29,4154	9999
347	29,0114	34,1305	9999	9999
348	36,5346	39,0934	40,2218	42,3486
349	41,6642	36,9292	42,0805	38,262
350	35,5906	34,9172	43,9689	31,8331
351	37,8203	25,7486	31,931	9999
352	47,4343	9999	53,1112	9999
353	41,2003	43,0966	46,2992	39,966
354	53,3016	60,1139	58,6739	54,4033
355	40,7457	41,0096	32,9754	37,7281
356	37,1482	26,3789	57,4581	52,9195
357	26,2336	26,4094	31,3941	28,7775
358	31,5492	42,6032	9999	9999
359	31,1446	32,2304	9999	9999
360	28,5794	28,1922	9999	28,312
361	29,7432	37,2954	45,1784	36,7861
362	35,1687	50,0669	9999	9999
363	43,0034	39,9448	45,7996	42,7311
364	46,7434	41,2794	43,9196	31,3582
365	35,621	35,9111	9999	9999
366	9999	30,932	25,4312	9999
367	21,8942	26,079	30,8904	27,3249
368	9999	37,2854	39,0313	43,2029
369	37,3032	36,4231	41,2184	9999
370	24,9334	23,5069	24,2458	26,0122
371	26,9215	26,5939	32,6039	30,7756
372	32,3026	36,2365	36,8377	28,7104
373	17,6435	19,7203	32,0302	27,967
374	39,2115	33,2688	9999	34,892
375	22,6908	25,3306	26,6455	36,9996
376	12,2933	16,822	9999	9999
377	41,7315	34,8273	33,3859	26,9912
378	32,5637	9999	44,531	31,2758
379	50,8331	47,0485	48,8735	46,6726
380	49,822	55,1977	53,8297	54,8312
381	26,9549	35,9216	31,986	38,6143
382	46,2394	55,8134	48,0392	53,8613
383	37,4501	40,9831	43,4207	22,9779
384	45,3297	39,4249	42,3914	9999
385	47,4919	55,5387	9999	9999
386	9999	50,8266	9999	29,8858
387	30,4548	27,7978	39,1	38,8884
388	31,203	9999	34,1476	9999
389	9999	40,0303	40,9526	39,1781
390	32,5695	32,1692	30,3704	29,3117
391	33,1023	39,761	9999	41,1744
392	31,8489	9999	28,2328	17,8778
393	26,9549	28,9346	28,9303	29,9006
394	21,2727	38,0403	25,6704	9999
395	35,5309	9999	32,9545	43,7589
396	43,0322	47,3559	47,6458	42,8102
397	16,9325	17,7065	9999	9999
398	35,5036	30,1701	9999	23,1719
399	32,2786	57,9005	9999	9999
400	47,2084	53,276	54,9476	58,6379
401	9999	35,6725	44,1956	47,0787
402	43,9899	48,9747	44,8372	45,4986
403	35,3517	33,2286	24,7323	33,5934
404	37,8237	35,2416	9999	9999
405	21,8835	20,6882	26,5932	24,5619
406	45,7503	35,3194	36,2957	33,6478
407	35,5438	38,1873	9999	9999
408	33,552	29,9604	33,2819	34,3
409	31,5744	9999	9999	33,8191
410	39,8472	36,4694	21,4625	22,6557
411	42,4892	38,9068	9999	36,4618
412	26,0561	30,4776	30,1374	9999
413	32,4271	31,3535	31,3766	32,5124
414	42,2343	34,5909	35,6377	32,4902
415	47,2792	43,2559	52,9182	55,4188
416	14,2784	20,7119	57,6094	62,3756
417	25,7755	24,8174	23,8958	23,3162
418	41,1129	37,3671	9999	59,1258
419	34,7024	32,1644	9999	30,5656
420	35,0405	32,2507	29,4206	31,1586
421	45,0211	43,9743	49,1594	46,072
422	39,0894	44,1997	53,3058	47,8269
423	40,6715	39,2142	42,4276	46,9736
424	40,5796	44,0081	42,6474	40,6757
425	45,576	46,8861	9999	9999
426	9999	39,2211	48,2192	47,678
427	35,7296	37,1056	39,1692	35,6068
428	45,1005	51,4017	9999	9999
429	44,3012	38,7031	48,1043	45,6797
430	9999	9999	35,4789	37,315
431	43,0363	40,6458	9999	9999
432	51,2638	9999	56,6512	9999
433	49,0893	39,7036	9999	29,2233
434	56,682	54,6491	54,9746	9999
435	9999	31,4085	24,8247	26,723
436	36,3435	9999	42,1482	43,0814
437	33,0955	40,7324	34,5365	47,7627
438	45,2823	40,541	9999	32,6533
439	39,5639	42,3457	9999	9999
440	28,0233	42,2532	47,7942	9999
441	59,6862	42,1018	38,7085	38,1523
442	49,1545	34,1622	43,0234	49,1018
443	42,7017	34,7004	48,8717	43,2784
444	25,0428	25,51	28,6811	29,461
445	41,5082	43,2684	46,2165	45,8399
446	33,7116	36,7696	38,1064	41,8878
447	47,0549	52,9597	48,6024	55,9961
448	9999	29,5299	9999	37,0525
449	44,0157	9999	37,8809	9999
450	43,2305	45,6285	41,3264	48,4404
451	42,7494	35,0701	37,343	35,722
452	54,2912	41,1331	49,9108	54,2633
453	43,3107	37,3274	35,5891	59,1395
454	38,9761	42,7711	43,7612	43,6687
455	38,3108	39,9679	33,0526	36,9134
456	31,4232	40,1308	33,7157	9999
457	37,8509	32,6884	9999	9999
458	45,8218	43,1515	45,652	44,3991
459	28,9394	9999	25,388	9999
460	29,5697	40,0255	9999	37,0514
461	30,5417	35,2834	9999	9999
462	32,577	33,0415	34,3896	9999
463	31,1166	22,1398	9999	9999
464	39,7458	9999	56,4692	45,5832
465	41,8577	9999	46,3236	9999
466	27,3001	33,7576	31,4742	9999
467	32,2468	32,4206	33,08	31,9189
468	23,7651	15,1309	18,5657	26,5495
469	40,3946	43,4722	40,4638	52,4703
470	28,8085	22,7022	9999	9999
471	38,3517	56,4971	9999	57,6857
472	30,312	29,2414	30,8691	25,8758
473	50,3136	45,7197	54,7805	9999
474	36,8775	9999	36,7283	9999
475	51,3138	54,3938	54,4793	55,1769
476	44,1666	37,1501	9999	38,2211
477	47,0055	42,4014	44,8714	9999
478	35,5245	39,5235	35,4699	9999
479	25,7174	9999	24,2499	22,2053
480	41,6612	48,4508	44,2733	33,7331
481	37,0967	9999	38,1379	44,1332
482	22,8852	20,0775	25,0363	25,0363
483	46,9817	46,9241	9999	9999
484	48,3629	50,0801	9999	9999
485	23,1559	24,9934	25,2717	9999
486	58,9288	9999	57,377	9999
487	27,9646	19,8168	34,3751	36,155
488	53,9641	61,3394	58,2979	63,2915
489	30,8183	9999	27,4342	31,4029
490	27,3024	48,2034	45,3627	46,5454
491	32,4941	54,4751	44,1181	46,1934
492	32,7689	9999	36,7361	9999
493	27,2709	37,537	44,6122	9999
494	44,8749	39,2954	46,0716	9999
495	39,2879	33,0242	40,7041	32,2547
496	40,776	36,3799	40,6295	9999
497	40,27	35,0701	44,2104	9999
498	9999	23,0318	9999	37,7955
499	48,339	51,0307	45,0141	49,1154
500	36,0496	30,0827	35,9047	42,0549
501	34,7745	38,8359	40,8661	39,249
502	21,9175	17,1458	9999	9999
503	30,7142	36,4321	25,1249	38,1072
504	33,5692	9999	28,1818	33,4729
505	53,5454	42,4814	45,0701	45,3625
506	31,059	46,4498	36,919	43,4892
507	42,9795	44,4594	9999	37,5696
508	30,4165	29,1993	24,438	26,3225
509	33,7319	34,344	38,7122	46,7857
510	42,0478	39,6901	37,8462	37,8462
511	48,0019	52,5668	56,0487	57,4303
512	24,4881	9999	9999	36,1172
513	34,6023	31,6134	30,0536	9999
514	27,8171	31,7113	9999	25,6265
515	9999	56,2736	56,2968	45,6162
516	37,1746	48,3791	57,0943	56,436
517	26,1393	21,044	19,0961	22,1098
518	52,2076	9999	41,4501	45,5197
519	23,1817	25,3174	9999	9999
520	29,961	35,3092	9999	33,7662
521	55,4188	43,6241	55,2271	61,6977
522	32,6551	46,475	41,1714	48,1891
523	9999	34,9006	9999	32,3665
524	42,618	39,271	40,1812	35,3255
525	26,8293	29,616	29,9365	26,0598
526	30,7212	30,4858	42,5339	30,4748
527	31,2874	28,7701	34,4401	29,4945
528	37,2209	41,3541	42,2308	9999
529	35,257	36,0141	39,3155	31,3196
530	33,3221	28,1781	9999	9999
531	31,3667	43,1073	42,5125	51,0951
532	46,7692	61,4596	58,7962	50,6066
533	9999	31,2822	31,6465	29,1124
534	46,7186	9999	9999	47,7074
535	45,2846	38,2367	38,896	54,0211
536	18,0508	31,7285	36,1145	35,527
537	43,7774	39,3404	9999	25,6273
538	35,1981	9999	52,9488	50,8274
539	9999	24,31	16,8807	27,212
540	9999	9999	41,0931	36,0299
541	9999	42,124	44,7322	35,0228
542	56,3988	53,5902	48,7017	9999
543	9999	51,0701	51,5951	57,2834
544	47,1579	56,6102	48,5469	9999
545	49,2105	42,4272	52,5974	9999
546	29,7149	33,9678	37,0902	32,3788
547	9999	55,4364	50,4704	36,1717
548	37,2114	9999	35,5213	30,7625
549	60,1612	60,1612	60,1612	60,1612
550	38,5675	50,6734	33,0495	9999
551	63,6696	60,1139	9999	9999
552	48,9496	47,6959	9999	48,4703
553	45,9009	40,4555	43,6393	39,1625
554	54,0948	53,1135	55,5387	57,6837
555	45,955	38,7618	9999	9999
556	59,8368	56,6462	60,3365	9999
557	52,7391	58,4513	54,7362	54,4385
558	39,0079	35,6709	40,1968	40,8427
559	41,046	41,0659	43,11	39,6342
560	55,1977	55,585	57,3427	56,6217
561	9999	43,8997	38,2221	41,8143
562	9999	54,5072	51,0615	50,87
563	9999	23,9435	31,7947	33,488
564	9999	59,2805	39,652	46,0727
565	50,8818	36,7855	36,4381	9999
566	44,8372	44,0934	42,0697	47,1164
567	48,6626	41,891	9999	48,8621
568	44,7726	47,6739	9999	9999
569	47,4763	54,0852	57,3427	54,0852
570	39,509	54,9386	51,4099	31,7825
571	46,6074	44,0793	37,3454	56,1968
572	41,942	43,8053	54,7362	51,7005
573	31,8106	9999	36,0367	9999
574	45,9726	42,7887	41,7886	9999
575	45,6678	39,5804	49,4796	37,4316
576	28,7627	27,6827	36,1677	51,2789
577	44,9473	42,6936	54,0211	54,0852
578	40,5499	42,1358	42,0627	37,8581
579	43,0918	38,8514	36,5912	9999
580	25,6609	27,7566	9999	9999
581	9999	9999	38,1898	43,0236
582	36,0684	37,1104	26,7267	36,4085
583	26,9345	26,9215	30,7797	9999
584	38,5411	47,2601	50,5153	49,4028
585	34,4513	28,8684	36,5749	32,7822
586	46,3304	49,3225	47,9465	51,5837
587	30,326	40,9488	37,0087	35,154
588	38,487	38,1262	41,5754	42,2429
589	49,3808	50,438	9999	9999
590	40,2252	41,9935	41,9935	41,9935
591	49,7829	40,4479	48,2618	47,6969
592	40,3856	35,1307	42,4989	43,5376
593	38,8886	39,6294	37,5939	9999
594	31,6733	38,6218	54,3223	58,4943
595	38,5839	27,1842	35,4732	9999
596	46,0934	50,8818	49,1368	54,9362
597	9999	39,4353	9999	36,0595
598	46,3767	40,3994	40,375	26,079
599	33,4665	29,8479	28,8085	33,0903
600	31,5749	35,16	37,8941	45,1791
601	33,6372	24,5279	24,2157	33,4483
602	39,6375	35,0999	32,7955	43,5435
603	43,3972	43,6871	49,5688	39,1178
604	30,049	45,1913	9999	9999
605	31,884	32,6485	38,8562	9999
606	18,2167	17,4891	9999	9999
607	9999	49,9501	54,0852	56,2302
608	51,6448	51,4531	47,163	39,7413
609	36,2764	38,7524	31,1648	44,7693
610	28,6804	25,534	36,1697	9999
611	9999	9999	20,7726	22,9799
612	9999	50,2456	54,6102	9999
613	31,2095	37,402	37,1561	9999
614	51,2172	49,6512	36,5156	33,5796
615	9999	9999	37,5364	35,486
616	27,9943	48,0174	52,3589	33,6089
617	36,1282	41,2714	37,2463	9999
618	25,6947	26,3766	26,3239	32,0111
619	35,0701	31,986	9999	9999
620	32,6144	26,0305	34,3786	27,3175
621	24,352	21,8446	9999	22,8907
622	9999	29,3581	9999	26,2911
623	26,5872	30,2938	9999	9999
624	45,286	52,2076	49,6512	43,8429
625	42,659	46,2186	54,1152	52,8701
626	34,6163	9999	30,2595	41,4633
627	32,2544	31,2224	9999	9999
628	26,3827	26,2997	9999	21,3731
629	34,5975	39,4958	32,2999	39,6423
630	37,6124	9999	48,2387	9999
631	9999	35,9883	9999	38,81
632	43,7076	43,8257	9999	9999
633	44,6241	9999	52,4835	9999
634	30,0834	30,112	30,5776	29,1092
635	29,4344	9999	9999	23,1538
636	45,1551	52,0624	46,0462	45,101
637	33,1694	38,9625	45,8313	40,6526
638	26,5002	19,1392	19,5768	15,8152
639	34,7745	40,0085	41,8159	35,7376
640	25,6185	35,2144	32,0334	33,0857
641	34,0794	40,8828	9999	9999
642	29,8806	32,9551	40,3946	35,9047
643	23,9089	17,1423	26,5695	9999
644	29,0918	9999	9999	30,5439
645	32,9402	23,6467	19,8769	29,2481
646	42,7567	50,2478	9999	9999
647	30,1826	9999	40,3477	52,9597
648	47,2091	44,8396	41,3264	39,6237
649	21,8347	23,7956	9999	9999
650	38,9784	40,3925	49,0649	46,9414
651	35,4727	9999	34,7586	39,4047
652	22,2365	27,339	20,8656	21,3907
653	35,4832	38,5377	37,6594	34,2461
654	45,8211	36,8498	38,6352	41,6897
655	42,8571	44,7156	53,6406	51,8793
656	32,8755	31,5372	36,2054	32,7658
657	52,3572	57,6588	38,9271	54,9803
658	24,2804	9999	9999	28,2884
659	58,6627	9999	9999	58,6627
660	9999	48,8813	51,1605	49,8988
661	48,1716	39,313	52,3521	51,0153
662	43,3388	48,9816	9999	9999
663	9999	56,3117	9999	59,8674
664	24,14	28,5294	25,146	28,039
665	33,6244	32,4626	37,5199	51,891
666	42,372	38,7091	44,7401	40,7091
667	32,9545	29,4206	30,3891	32,9545
668	27,8092	30,5072	28,052	24,1504
669	35,0707	37,8005	34,7131	9999
670	31,8228	36,4701	40,4343	44,2039
671	51,3556	53,4292	47,4086	9999
672	48,0459	43,4054	9999	44,5639
673	32,9714	49,1959	50,6579	9999
674	51,6927	58,9047	50,7682	62,2285
675	48,4215	49,6298	44,7518	42,233
676	39,3075	47,8817	42,618	48,6613
677	33,806	39,5891	9999	38,9372
678	29,1066	33,9155	9999	9999
679	40,3757	34,9258	46,3017	41,1309
680	34,7744	37,7676	37,0515	30,0465
681	32,3169	31,1536	31,3316	27,2634
682	54,7846	9999	35,7299	33,6826
683	9999	29,3612	31,3595	9999
684	30,0741	30,0521	29,2572	31,2822
685	9999	49,865	9999	54,4217
686	42,7151	32,4256	9999	9999
687	51,6606	51,3357	55,3254	9999
688	9999	20,4255	24,7835	22,734
689	44,6494	43,4034	51,4339	49,2988
690	9999	39,7953	31,2969	30,2506
691	46,6474	48,9972	43,9044	26,6582
692	34,0869	38,0571	41,3592	9999
693	30,7111	39,0842	45,4031	9999
694	9999	25,9886	30,659	9999
695	21,394	9999	19,8518	19,1835
696	26,9164	34,7833	28,7106	31,9303
697	42,8173	44,5382	45,805	57,5638
698	30,8202	29,4253	38,1676	34,8906
699	34,8457	47,668	49,0254	46,5524
700	37,2406	39,1208	37,8653	42,2832
701	39,3591	44,2273	36,7864	9999
702	43,4126	44,2662	45,1703	50,6734
703	37,2478	38,8359	9999	9999
704	28,8085	28,684	34,1486	39,3612
705	20,5514	18,5657	9999	9999
706	35,1968	33,3346	34,0384	39,3314
707	22,3017	25,1994	37,5228	32,1646
708	32,9701	55,1977	57,5502	56,0967
709	24,9934	28,102	24,5391	21,8856
710	33,5376	9999	37,5144	43,2173
711	19,1674	9999	25,5446	9999
712	39,6989	41,9278	45,3043	52,1665
713	9999	21,6665	23,9964	28,4964
714	41,547	46,5478	54,0835	43,269
715	9999	41,1965	38,896	9999
716	25,1438	41,1403	9999	9999
717	35,8585	33,4415	9999	35,4278
718	49,3778	35,4313	9999	9999
719	34,9415	56,5323	42,3214	45,8495
720	17,4436	19,6913	9999	21,7864
721	31,9162	32,8626	37,0406	25,0486
722	46,1661	50,203	9999	47,194
723	45,9129	52,9086	41,7826	41,6516
724	28,7306	31,5729	29,9525	22,2005
725	28,4184	38,1407	9999	9999
726	36,8391	46,3304	44,2662	40,3958
727	35,091	34,7658	31,6025	9999
728	39,4272	51,196	9999	43,6283
729	36,5729	37,3144	37,1749	37,9819
730	9999	9999	22,7031	25,676
731	44,1289	62,1416	62,1416	60,479
732	37,8063	48,2549	42,8213	41,2769
733	49,5428	54,1947	9999	9999
734	45,8952	53,44	57,3427	55,1977
735	32,9754	31,986	31,2295	30,46
736	38,6405	41,6715	47,2658	52,6413
737	37,493	26,7354	37,315	46,2831
738	39,2219	9999	9999	42,3355
739	25,1523	32,6259	31,1086	37,9558
740	38,6798	55,8656	9999	47,7314
741	39,0208	36,0245	9999	9999
742	36,3824	38,2268	35,003	31,5287
743	47,9404	47,4148	48,7519	47,2228
744	33,231	47,4235	51,8916	39,5813
745	42,337	47,0748	51,1818	9999
746	38,7471	9999	32,9795	29,82
747	44,9908	52,4678	38,4528	53,5201
748	36,5471	9999	52,2304	53,847
749	42,0576	49,476	47,064	42,6814
750	18,6663	15,5641	12,5461	9,9966
751	9999	34,125	33,5526	9999
752	43,9521	53,7296	9999	9999
753	35,0565	37,1425	9999	9999
754	42,2372	46,3624	49,1616	52,8453
755	33,4181	9999	36,89	42,0995
756	29,3809	9999	9999	29,3139
757	36,5204	49,6337	9999	9999
758	9999	18,5195	11,5134	14,0414
759	33,7131	9999	33,3975	28,7232
760	27,8188	37,0559	42,1619	45,1853
761	30,7624	9999	28,6136	26,5695
762	40,5337	42,9174	50,2336	54,4143
763	42,6394	37,1326	34,0886	27,9682
764	37,0665	39,5723	9999	9999
765	30,5981	29,0283	9999	9999
766	51,2876	50,4256	56,0918	55,4502
767	44,8272	50,8061	43,2624	46,2264
768	9999	36,6992	33,5717	38,6222
769	50,8766	34,9907	53,1714	44,9153
770	41,2831	45,6435	42,546	56,1382
771	36,0349	39,5255	37,9545	30,1886
772	40,3335	40,5267	45,5855	39,0313
773	53,2401	59,3542	57,3427	59,3542
774	41,6023	40,3441	37,3646	9999
775	9999	33,1181	34,4659	42,1706
776	56,2302	54,0852	57,3427	60,8077
777	33,8152	34,3231	9999	35,9344
778	50,0993	51,0951	50,7668	51,0951
779	41,6667	41,6928	46,7459	37,9214
780	48,574	56,835	62,6477	61,0856
781	51,5774	9999	9999	54,296
782	37,6103	44,9864	31,6808	43,6028
783	37,2425	40,1907	42,3383	39,2775
784	43,9771	43,3518	34,7744	42,4909
785	47,868	49,2016	9999	43,9691
786	9999	41,335	39,0714	37,0327
787	9999	26,7835	31,2295	29,4206
788	27,3493	34,2761	9999	9999
789	53,6811	54,3062	54,0476	48,4584
790	20,7569	12,3304	17,2375	23,2878
791	34,4867	55,1977	9999	50,826
792	50,8818	9999	38,8251	9999
793	38,1101	41,0761	45,9117	50,6734
794	61,8645	63,6696	61,998	63,6696
795	28,9603	9999	9999	34,8367
796	34,3136	38,4249	48,4013	47,0154
797	42,3762	42,8595	52,2761	60,1612
798	26,3239	38,1836	9999	9999
799	50,4362	47,9281	48,9931	37,4422
800	47,9815	39,5107	52,9049	9999
801	49,1466	29,4465	39,9706	38,9795
802	42,1241	43,8053	47,3272	43,3675
803	33,5317	40,0581	9999	33,1546
804	38,1802	33,7553	35,4585	41,0467
805	45,8559	52,3275	51,3914	9999
806	38,4909	9999	32,7399	28,071
807	9999	29,6905	29,993	9999
808	30,3017	28,052	28,4506	28,0122
809	32,2911	31,3789	30,5776	26,0919
810	9999	28,8085	34,1016	9999
811	45,5267	51,5568	45,117	9999
812	23,0497	18,8127	25,2931	26,4332
813	9999	41,8269	44,3381	37,893
814	32,6362	35,4208	40,3424	42,2272
815	41,8973	53,1714	9999	39,327
816	31,9343	36,4208	34,4263	9999
817	28,5971	28,6257	28,8085	30,159
818	26,9472	51,366	32,745	33,1082
819	61,8645	63,6696	60,3365	58,4265
820	29,7853	31,0459	9999	39,1172
821	42,7558	44,0547	9999	9999
822	41,3519	9999	53,8161	9999
823	9999	44,3878	43,0124	36,5637
824	58,4513	63,6696	63,6696	60,1139
825	32,3858	35,1176	30,2937	35,7874
826	40,4256	47,3039	39,9437	40,6482
827	57,3953	61,0856	60,072	57,3953
828	58,4265	61,2219	58,6649	60,3365
829	55,6777	57,6837	57,5502	59,6952
830	27,8408	28,3516	9999	9999
831	25,2575	29,9006	30,0996	35,0707
832	55,116	39,0786	47,2364	52,3275
833	38,4726	53,4135	9999	9999
834	35,0265	27,265	9999	9999
835	40,0647	39,9538	41,2337	9999
836	34,7566	34,9473	32,6033	33,3451
837	55,5812	9999	56,6462	47,6423
838	41,5166	42,1841	9999	9999
839	40,7459	45,5951	48,5278	44,8654
840	58,6627	58,6627	60,8077	62,1727
841	53,8719	51,9992	51,9992	53,4527
842	9999	44,4578	42,5626	49,5138
843	54,1568	60,3161	9999	46,9032
844	39,0732	48,1111	45,9343	46,9241
845	9999	44,6658	45,3157	43,3464
846	46,5454	46,1661	54,0852	50,3342
847	35,0415	21,1811	9999	30,7678
848	45,5159	37,4507	9999	54,9765
849	9999	9999	36,0598	48,7752
850	59,6939	9999	60,1445	9999
851	51,4281	9999	9999	55,7801
852	9999	45,9768	40,6725	43,3822
853	9999	49,1531	9999	59,6862
854	38,6863	50,3342	50,826	43,4158
855	29,9477	32,349	38,1144	9999
856	33,7454	9999	34,1543	43,3686
857	24,216	28,5721	17,5862	30,8167
858	41,7775	41,6264	9999	9999
859	9999	38,1371	44,2013	44,7471
860	9999	42,5474	42,553	9999
861	19,7449	19,6188	26,6099	9999
862	37,1382	38,0406	40,5732	41,0603
863	9999	46,33	9999	35,2708
864	38,6001	45,6957	46,5981	45,6543
865	31,4829	32,1423	37,2327	9999
866	39,3705	51,7419	49,1297	51,1608
867	34,812	33,7846	36,8687	50,1551
868	24,1353	22,3446	24,6544	20,9595
869	33,6786	51,3728	9999	9999
870	28,6983	21,4313	18,9798	9999
871	38,1114	29,1356	49,9338	43,1851
872	35,3825	33,4458	9999	43,8379
873	39,5135	40,9439	9999	42,9559
874	34,7004	42,1802	40,0646	34,7004
875	40,6151	38,6502	47,4815	9999
876	30,3549	35,0701	40,0872	37,1561
877	39,4282	44,6082	44,3039	37,9261
878	36,8735	44,0027	47,9141	40,9375
879	59,1045	60,4653	61,7535	9999
880	50,4012	49,9103	58,2495	57,8155
881	41,5149	32,7921	33,806	34,1336
882	34,5554	29,7156	25,6265	36,3693
883	30,3504	36,9427	35,1244	34,6843
884	54,7371	53,44	55,585	57,3427
885	32,8165	29,3577	9999	26,3827
886	38,4018	39,2236	9999	9999
887	48,9816	52,1788	55,9103	52,5923
888	35,6138	36,2323	39,2083	35,9533
889	43,5521	39,3505	49,0532	9999
890	34,5203	38,9428	38,5758	29,4336
891	49,6694	48,9148	48,2325	48,2022
892	37,9689	41,3598	48,9542	9999
893	33,2215	9999	37,0834	33,5862
894	46,2865	43,4993	36,7121	48,2316
895	40,27	48,169	50,9979	49,3247
896	16,8581	27,5435	9999	9999
897	63,027	62,007	63,6696	9999
898	43,9006	49,5779	9999	50,9595
899	51,1813	51,7126	50,2593	58,7962
900	9999	30,9728	42,778	42,6712
901	27,3559	9999	29,961	27,7123
902	36,6048	29,1466	9999	9999
903	23,9851	9999	29,1249	34,5007
904	40,7393	50,8936	29,148	33,669
905	31,4296	38,3041	52,1203	9999
906	39,8684	38,1961	9999	9999
907	40,4318	9999	51,6086	9999
908	9999	30,6084	30,1546	27,9481
909	9999	9999	31,2326	28,5215
910	39,8487	32,9853	33,3823	47,972
911	25,825	33,1023	40,8735	45,061
912	9999	34,0253	47,707	9999
913	41,4279	9999	32,4183	42,3955
914	43,337	47,2439	48,2962	9999
915	41,0096	42,4716	9999	9999
916	43,1137	40,5159	40,3935	9999
917	9999	34,8297	43,7014	44,6235
918	41,7257	46,9256	50,8595	50,5671
919	35,7503	35,1155	34,1305	39,176
920	49,4822	32,3589	50,8404	9999
921	40,2246	9999	38,2582	38,109
922	52,7173	44,9328	61,6977	51,9992
923	32,1871	35,8025	42,4198	9999
924	48,1269	45,8981	47,1762	48,903
925	26,7532	26,7532	9999	9999
926	15,6109	9999	9999	16,0466
927	22,1682	30,7121	9999	9999
928	46,2191	55,6089	9999	9999
929	40,6458	47,851	9999	9999
930	30,8743	24,9897	28,8668	34,1688
931	44,2029	35,2727	39,4035	9999
932	31,7072	25,4972	9999	9999
933	32,5395	9999	22,2639	9999
934	40,8033	44,7443	39,176	9999
935	33,6568	9999	33,8291	9999
936	34,2469	37,7808	35,963	37,9272
937	48,6153	49,2574	9999	9999
938	9999	9999	31,3426	39,5172
939	9999	36,2121	20,3342	19,2463
940	9999	52,385	55,3945	41,3863
941	9999	45,4026	46,4896	52,8528
942	9999	51,6509	49,0395	9999
943	9999	27,7118	23,8237	41,6774
944	9999	26,8608	27,646	21,4787
945	22,1585	9999	23,4756	21,4899
946	32,064	9999	53,1033	52,5596
947	41,2689	48,3629	53,4653	54,4793
948	38,2285	48,073	46,368	37,0877
949	46,7932	42,8245	45,6356	40,5411
950	30,0767	26,5033	27,3497	25,343
951	41,3904	9999	43,5322	9999
952	48,055	50,203	52,7594	48,7098
953	34,3033	9999	41,7474	30,5654
954	37,5191	41,728	42,0036	46,0181
955	44,487	44,9945	9999	52,0033
956	34,701	32,9551	38,9928	9999
957	38,0368	44,1061	36,9515	37,9742
958	32,465	33,1919	31,5988	9999
959	35,139	35,2521	47,9441	31,4761
960	35,6075	38,0565	9999	9999
961	33,0325	28,9155	36,2655	37,529
962	25,9139	30,9104	35,0272	33,0756
963	9999	9999	38,6735	45,6831
964	48,2696	55,4188	9999	9999
965	31,3971	34,9257	33,06	41,3131
966	30,4692	9999	36,6252	9999
967	28,5884	9999	36,7944	37,2067
968	34,7926	28,6402	34,0173	29,0796
969	31,4938	42,3014	9999	9999
970	39,224	44,3617	33,6157	46,8169
971	37,1879	35,7248	45,5576	36,8605
972	33,8355	33,8355	36,412	29,7344
973	36,1593	43,38	9999	9999
974	22,3819	47,3718	9999	41,5216
975	43,2205	39,5134	39,7754	48,8306
976	51,4606	61,934	55,7552	35,7468
977	32,4275	25,5577	29,7983	9999
978	29,3677	9999	9999	28,5215
979	36,2337	9999	33,42	41,9663
980	32,2501	9999	31,2165	30,112
981	9999	9999	41,5512	35,0358
982	39,2286	28,1093	9999	9999
983	29,6416	40,8646	9999	9999
984	34,6538	37,3925	41,8839	51,1342
985	25,4911	27,5881	23,2443	9999
986	34,284	34,2978	33,785	30,9295
987	29,5263	29,4555	28,6433	31,971
988	41,5765	54,5536	52,4397	9999
989	37,7967	37,121	49,3225	52,9318
990	9999	37,8922	48,8094	45,7197
991	33,7516	39,8771	43,365	52,0033
992	9999	42,3106	42,5038	9999
993	46,9469	33,8763	36,6545	48,073
994	25,028	9999	26,648	9999
995	9999	40,0145	40,0145	40,3891
996	32,0904	9999	29,2045	32,4414
997	36,4865	9999	59,5527	9999
998	35,3207	27,7228	9999	9999
999	34,828	22,2717	25,9113	25,4187
1000	33,1759	9999	35,891	9999
1001	47,7957	46,038	47,0274	50,6779
1002	38,4136	41,7069	42,4797	42,2527
1003	43,609	42,241	54,3621	9999
1004	45,0904	39,4722	9999	50,3438
1005	46,9832	36,5944	49,6289	45,8883
1006	33,6885	39,1916	38,5241	37,6172
1007	33,0409	30,6728	9999	9999
1008	32,5194	9999	29,9528	33,2615
1009	36,6668	45,544	9999	9999
1010	35,0119	30,7625	34,7745	31,986
1011	47,1428	9999	45,1033	50,4435
1012	35,1382	37,347	9999	9999
1013	40,6028	45,0624	9999	9999
1014	35,0269	34,4529	31,9724	29,8368
1015	31,2801	34,0701	50,8954	44,1739
1016	32,6657	9999	9999	28,8307
1017	9999	33,236	31,4242	9999
1018	9999	47,0748	41,5512	51,009
1019	9999	33,4446	32,2213	30,1592
1020	9999	57,7266	58,2715	9999
1021	53,5085	55,2535	52,8528	52,2634
1022	21,9217	26,9964	26,0989	15,0098
1023	29,7486	30,5703	26,1504	27,1357
1024	36,5938	29,269	20,0481	9999
1025	14,8799	23,2172	48,2048	46,6576
1026	23,9326	32,28	34,2964	22,3507
1027	27,5695	9999	31,2651	37,2888
1028	9,1122	17,7159	9999	13,283
1029	34,7824	38,9605	36,8732	46,3593
1030	43,0276	45,9671	36,9442	45,3152
1031	34,0264	35,919	9999	9999
1032	27,258	34,9404	9999	9999
1033	33,292	34,4261	30,1645	39,0145
1034	10,7706	9999	9,9966	9999
1035	26,9512	26,0884	9999	9999
1036	36,6001	41,6081	9999	9999
1037	39,4297	39,8109	55,9413	39,3565
1038	16,6038	42,5074	9999	9999
1039	37,6159	38,8173	33,5875	9999
1040	26,9342	23,5955	26,5501	33,534
1041	47,7672	43,6922	47,3107	50,8572
1042	30,1978	9999	37,5793	33,3189
1043	40,5373	34,2652	9999	42,09
1044	24,7659	23,5498	9999	25,679
1045	36,9335	36,5907	36,8777	47,474
1046	27,994	24,766	33,4814	33,8683
1047	42,7927	48,2485	57,8508	56,6512
1048	42,3778	54,4143	42,1268	46,7156
1049	23,6981	23,7651	25,8607	9999
1050	37,6485	57,9946	52,8328	45,9904
1051	23,8197	21,9327	20,6252	23,9577
1052	31,1499	39,4881	9999	9999
1053	40,7644	50,7981	49,8829	51,8094
1054	40,0761	36,3966	9999	34,1214
1055	26,6286	26,6286	9999	9999
1056	36,3028	28,9481	29,5434	9999
1057	37,2713	27,9308	28,811	9999
1058	37,1258	30,0536	30,7727	17,8187
1059	32,0995	9999	36,7371	9999
1060	9999	41,8579	9999	35,5036
1061	24,7189	27,906	28,041	25,1244
1062	38,1088	43,6786	37,315	45,9578
1063	32,9545	30,4252	28,8085	34,1016
1064	18,3613	25,822	28,4599	32,2816
1065	47,8648	43,4784	44,9236	36,0163
1066	39,6767	33,806	43,6809	46,3655
1067	33,0182	41,2077	9999	9999
1068	12,4415	20,1104	16,4968	16,259
1069	25,1063	38,4387	9999	9999
1070	47,4296	57,2092	9999	58,6627
1071	49,6728	52,884	9999	44,8962
1072	22,9427	18,9386	9999	9999
1073	29,6464	35,8285	9999	9999
1074	35,2718	33,4067	33,0911	33,806
1075	31,0515	34,8798	36,6455	28,8741
1076	43,2001	44,0937	46,484	53,0268
1077	57,8882	55,7678	57,8882	57,8882
1078	31,1405	27,7523	23,393	46,4031
1079	35,9051	42,7214	45,0601	42,1851
1080	31,9953	41,6571	37,4629	40,5732
1081	36,6583	30,6044	30,6044	31,9724
1082	27,4482	9999	30,6232	9999
1083	32,1803	9999	33,9439	9999
1084	52,5486	56,6512	58,7962	9999
1085	30,6024	28,9389	27,3111	32,5107
1086	34,6239	30,5176	9999	9999
1087	43,0599	45,2557	9999	9999
1088	42,7097	34,7616	37,6495	9999
1089	34,3225	36,5044	38,6752	42,4462
1090	37,5305	52,1231	61,6977	58,7962
1091	34,9404	38,3893	39,965	41,54
1092	32,897	32,0264	30,1563	29,3868
1093	32,8114	9999	9999	48,5452
1094	45,5926	45,5856	43,7453	41,0862
1095	53,668	57,3929	56,837	53,713
1096	39,843	9999	48,3032	9999
1097	51,8721	9999	44,2039	9999
1098	29,8805	26,8438	30,4592	9999
1099	36,4815	33,6187	31,8943	35,7183
1100	29,1237	30,2168	31,4123	41,4598
